# Supplementary material
Source: Royal Society of Chemistry journal article supplement (doi:10.1039/d6nj00579a)
Supplement: d6nj00579a1.pdf [file d6nj00579a1.pdf]

*Supporting Information*

**Ion-Etching-Induced Defect Engineering toward Porous Fe–  
N–C for Efficient Oxygen Reduction Reaction**

*Yong Yang,<sup>a</sup> Kun-Zu Yang,<sup>a</sup> Ling Jia,<sup>a</sup> Hao-Ning Zhu,<sup>a</sup> Wen-Quan Yuan,<sup>a</sup> Ping-Jie Wei,<sup>a</sup> Chao Xu,<sup>\*b</sup> and Jin-Gang Liu <sup>\*a</sup>*

<sup>a</sup>Key Lab for Advanced Materials, School of Chemistry & Molecular Engineering, East China University of Science and Technology, Shanghai, 200237, P. R. China. E-mail: liujingang@ecust.edu.cn

<sup>b</sup>State Key Laboratory of Chemical Engineering, East China University of Science and Technology, Shanghai, 200237, P. R. China. E-mail: chaoxu@ecust.edu.cn

## 1. Chemicals

All chemicals and solvents were obtained from commercial sources and used as-received without further purification. High-purity water ( $\geq 18.25 \text{ M}\Omega\cdot\text{cm}$ ) and methanol were used to prepare the solutions.

## 2. Material synthesis

### (1) Synthesis of ZIF-L

ZIF-L was obtained according to the reported literature.<sup>[1]</sup> Specifically, 0.595g of  $\text{Zn}(\text{NO}_3)_2\cdot 6\text{H}_2\text{O}$  and 1.3136g of 2-MeIm were separately dissolved in 40 mL of deionized water. The aqueous zinc nitrate solution was then added to the aqueous 2-MeIm solution under stirring. The mixture was stirred at room temperature for 4 hours. The resulting product was collected by centrifugation, washed with deionized water, and dried in an oven at  $70^\circ\text{C}$ .

### (2) Synthesis of ZIF-R and pNC

ZIF-R was prepared by mixing  $\text{Zn}(\text{NO}_3)_2\cdot 6\text{H}_2\text{O}$  (0.100 g) and the pre-synthesized ZIF-L precursor (0.200 g) in co-solvent of DMF/ethanol (32 mL, V:V = 3 : 1). The mixture was treated by ultrasonication for 5 minutes and then heated at  $70^\circ\text{C}$  for 2 h. The resulting product was separated by centrifugation, washed several times with ethanol, and dried under vacuum. The dried ZIF-R was pyrolyzed under  $\text{N}_2$  at  $900^\circ\text{C}$  for 1 h with a heating rate of  $5^\circ\text{C min}^{-1}$  to obtain pNC.

### (3) Synthesis of d-Fe-N-C-x/T and d-Fe-N-C

20 mg of pNC were dispersed in 40 mL of methanol, followed by the addition of  $\text{Fe}(\text{NO}_3)_3\cdot 9\text{H}_2\text{O}$ . The mixture was stirred at  $50^\circ\text{C}$  for 24 h. The resulting solid, denoted as d-Fe-N-C-x, was collected by centrifugation. After drying, the product was pyrolyzed at  $800^\circ\text{C}$  for 30 min with a heating rate of  $5^\circ\text{C min}^{-1}$  to obtain the final catalyst d-Fe-N-C. Here, x represents the mass of  $\text{Fe}(\text{NO}_3)_3\cdot 9\text{H}_2\text{O}$  used (1, 2, 3, or 4 mg), and T indicates the pyrolysis temperature (700, 800, or  $900^\circ\text{C}$ ).

### (4) Synthesis of $\text{d}_x\text{-Fe-N-C}$

The added  $\text{Zn}(\text{NO}_3)_2\cdot 6\text{H}_2\text{O}$  amount was first adjusted to 50 mg and 200 mg, followed by pyrolysis to obtain pNC. The subsequent procedures were the same as those for d-Fe-N-C. The resulting catalysts with Zn salt additions of 50 mg and 200 mg were designated as  $\text{d}_{0.5}\text{-Fe-N-C}$  and  $\text{d}_2\text{-Fe-N-C}$ , respectively.

### (5) Synthesis of Fe-N-C

The preparation process of Fe-N-C was the same as that of d-Fe-N-C, except that ZIF-L was not subjected to the  $\text{Zn}^{2+}$  etching step.

### 3. Material characterization

The morphologies of catalysts were investigated using Transmission Electron Microscopy (ThermoFisher Talos F200X). X-ray Diffraction (XRD) patterns were performed on an X-ray powder diffractometer (D/max2550 V, Rigaku Japan). High angle annular dark field (HAADF)-STEM images were recorded using a convergence semi angle of 11 mrad, and inner- and outer collection angles of 59 and 200 mrad, respectively. N<sub>2</sub> adsorption-desorption data were obtained at liquid nitrogen temperature (77 K) on a Micromeritics ASAP 2010 M apparatus. X-ray Photoelectron Spectroscopy (XPS) was recorded on a Thermo Scientific TM K-Alpha TM+ spectrometer with a monochromatic Al K $\alpha$  X-ray source ( $h\nu = 1486.6$  eV) and the binding energies was referenced to the C 1s peak (284.8 eV) corresponding to the adventitious carbon. The Brunauer-Emmett-Teller (BET) method was used to calculate the catalyst surface areas. Raman spectra were obtained on a Renishaw 2000 instrument with a 532 nm excitation wavelength. The metal contents of the catalysts were measured by ICP-OES (Perkin Elmer Ltd., USA).

### 4. Electrochemical measurements

4.0 mg of catalyst was added to a 200  $\mu$ L of mixture solution in a centrifuge tube with Nafion dispersion and isopropanol in a volume ratio of 1:9. Then, catalyst was dispersed by ultrasonic for 30 min to form an even catalyst ink. 5  $\mu$ L of catalyst ink was dropped onto the surface of glassy carbon rotating disk electrode (RDE, area: 0.196 cm<sup>2</sup>) and dried naturally to form an even film with a catalyst mass loading of 0.5 mg cm<sup>-2</sup>. All control samples were dropped on the electrode with the same loading. The RDE as the working electrode, the graphite rod as the counter electrode and a Hg/HgO electrode as the reference electrode. All potentials reported were calibrated to the reversible hydrogen electrode (RHE).

Oxygen was bubbled in the 0.1 M KOH solution for 30 min to form an O<sub>2</sub>-saturated electrolyte before the ORR test. The catalysts were first active by conducting cyclic voltammetry (CV) between 0.1 and 1.1 V (*vs.* RHE) at a scan rate of 100 mV s<sup>-1</sup>. Linear sweep voltammetry (LSV) was conducted to evaluate the ORR performance at a scan rate of 10 mV s<sup>-1</sup> with an applied potential range from 1.1 to 0.1 V (*vs.* RHE) under the rotating speed of 1600 rpm. The CV measurement for ORR performance was conducted at a scan rate of 10 mVs<sup>-1</sup>. The electrochemically active surface area (ECSA) was determined by estimating electrochemical double-layer capacitances (C<sub>dl</sub>) with cyclic voltammograms in a non-faradaic region (1.00 - 1.20 V) at different scan rates (10, 15, 20, 25 and 30 mV s<sup>-1</sup>). The capacitive currents,  $\Delta J/2$  ( $\Delta J = J_a - J_c$ , J<sub>a</sub> and J<sub>c</sub> refer to anodic and cathodic current

densities at 1.10 V (vs. RHE), are plotted against the scan rate and fit to a linear regression. The slope is the  $C_{dl}$ . The accelerated degradation test by cycling between 0.2 V to 1.1 V at 100 mV s<sup>-1</sup> for 10000 cycles. The chronoamperometry was conducted at a potential of 0.5 V (vs. RHE) at room temperature with a rotating speed of 900 rpm. The electrochemical impedance spectroscopy (EIS) measurements were taken at a rotational speed of 900 rpm, encompassing a frequency spectrum from 10 kHz to 0.01 Hz, with a perturbation amplitude of 5 mV.

The electron transfer number ( $n$ ) can be calculated according to the Koutecky-Levich (K-L) equation as follows:

$$\frac{1}{j} = \frac{1}{j_l} + \frac{1}{j_k} = \frac{1}{B\omega^{1/2}} + \frac{1}{j_k} \quad (1)$$

$$B = 0.2nFC_0D_0^{2/3}\nu^{-1/6} \quad (2)$$

in which  $j$  is the experimental disk current density,  $j_l$  is the diffusion-limiting current density,  $j_k$  is the kinetic current density,  $\omega$  is the angular rotation speed of the working electrode in rad s<sup>-1</sup>,  $F$  is faraday constant (96,485 C mol<sup>-1</sup>),  $C_0$  is the bulk concentration of O<sub>2</sub> (1.2 × 10<sup>-6</sup> mol cm<sup>-3</sup>),  $D_0$  is the diffusion coefficient of O<sub>2</sub> in 0.1 M KOH solution (1.9 × 10<sup>-5</sup> cm<sup>2</sup> s<sup>-1</sup>), and  $\nu$  is the kinetic viscosity of 0.1 M KOH solution (0.01 cm<sup>2</sup> s<sup>-1</sup>). The K-L plots can be derived from LSV curves at different rotation speeds (400, 625, 900, 1225, 1600 rpm) under various potentials (0.30, 0.40, 0.50, 0.60, 0.70 V).

Turnover frequency (TOF, e s<sup>-1</sup> site<sup>-1</sup>) of the prepared catalysts was calculated from the below equations:

$$\text{TOF} = \frac{J_k N_e M_{\text{Fe}}}{N_A W_{\text{Fe}} C_{\text{Catal}}} \quad (3)$$

where  $J_k$  represents the kinetic current density (A cm<sup>-2</sup>),  $N_e$  is the electron number of per Coulomb (6.24 × 10<sup>18</sup> C<sup>-1</sup>),  $M_{\text{Fe}}$  is the molar mass of Fe (55.845 g mol<sup>-1</sup>),  $N_A$  is Avogadro constant (6.022 × 10<sup>23</sup> mol<sup>-1</sup>).

For the RRDE tests, the  $n$  and hydrogen peroxide yield (% H<sub>2</sub>O<sub>2</sub>) were calculated by the following equations:

$$n = \frac{4 \times N \times I_D}{I_R + (I_D \times N)} \quad (4)$$

$$\%H_2O_2 = \frac{200 \times I_R}{I_R + (I_D \times N)} \quad (5)$$

where  $I_D$  is the disk current,  $I_R$  is the ring current, and  $N$  (26%) is the collection efficiency.

## 5. Zinc-Air Batteries (ZABs) Performance Testing

4.0 mg of catalyst was added to a 200  $\mu$ L of mixture solution in a centrifuge tube with Nafion dispersion and isopropanol in a volume ratio of 1:9. Then, catalyst was dispersed by ultrasonic for 30 min to form an even catalyst ink. 5  $\mu$ L of catalyst ink was dropped onto the carbon fiber paper, achieving a final area of 1.0 cm<sup>2</sup>. Finally, the carbon fiber paper, gas diffusion layer, and nickel foam were conducted as the cathode and the zinc plate was conducted as the anode, and mixed solution of Zn (Ac)<sub>2</sub> (0.2 M) and KOH (6.0 M) as the electrolyte.

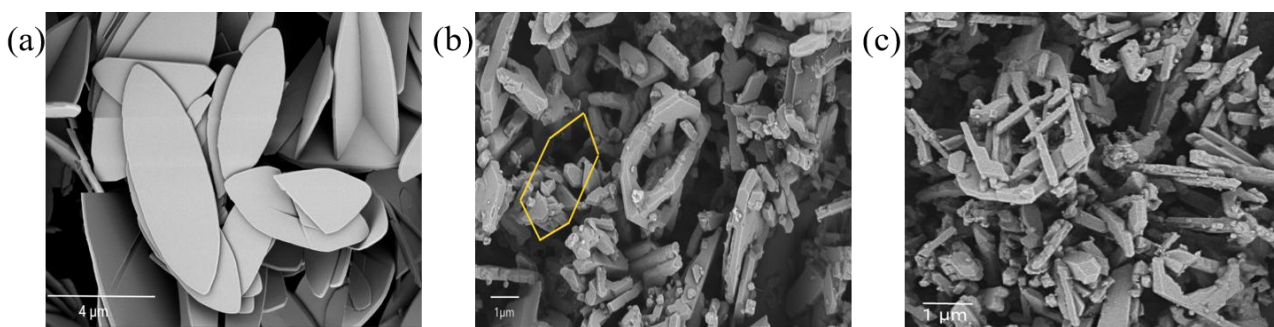

**Figure S1:** SEM images of (a) ZIF-L, (b) pNC and (c) ZIF-R.

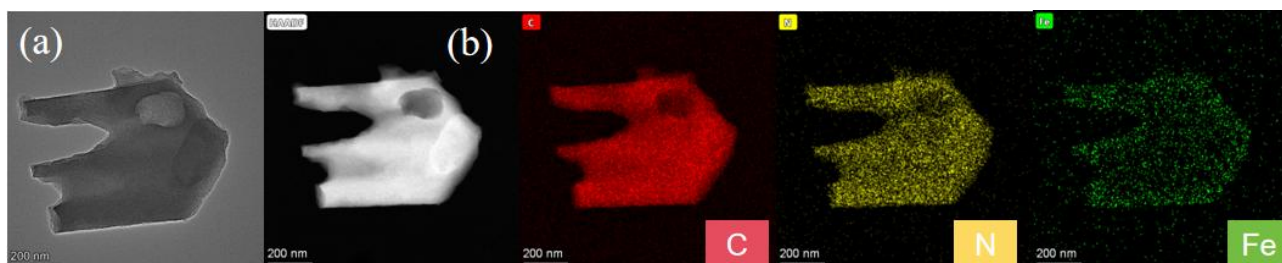

**Figure S2:** (a) HR-TEM, (b) HAADF-STEM, and corresponding elemental mapping of Fe-N-C

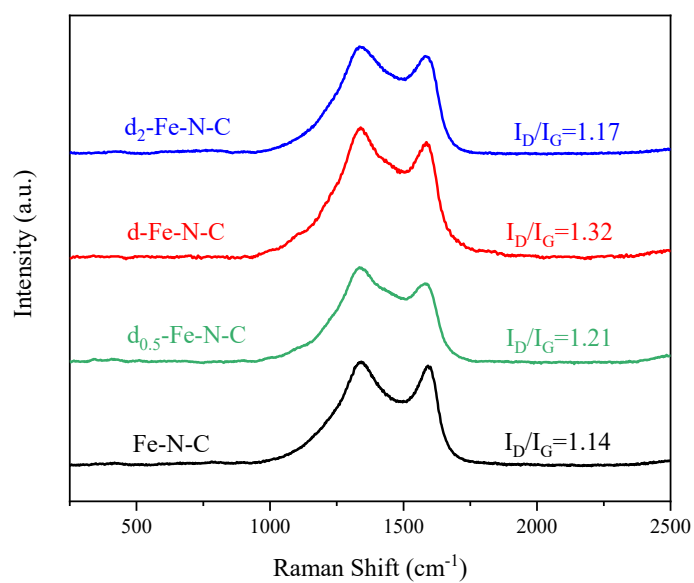

**Figure S3:** Raman patterns of  $d_x$ -Fe-N-C ( $x = 0.5, 1, 2$ ) and Fe-N-C.

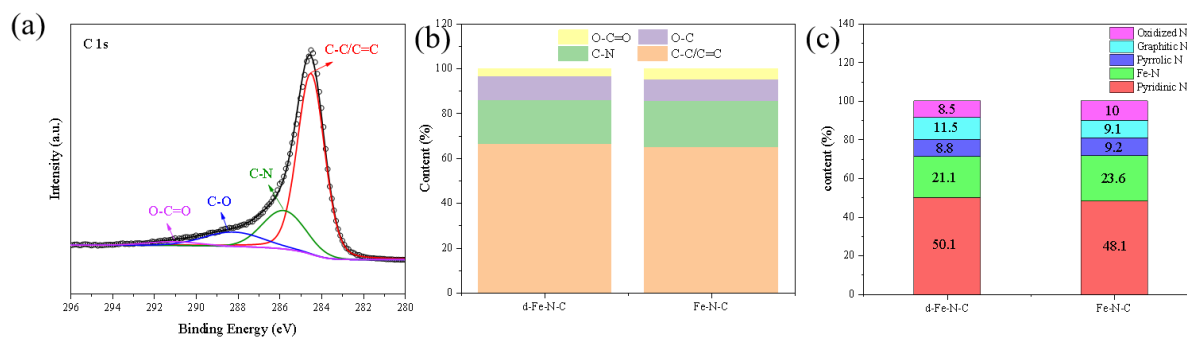

**Figure S4:** (a) High-resolution C 1s XPS spectra of d-Fe-N-C. (b) Contents of different C species and (c) N species in the d-Fe-N-C and Fe-N-C.

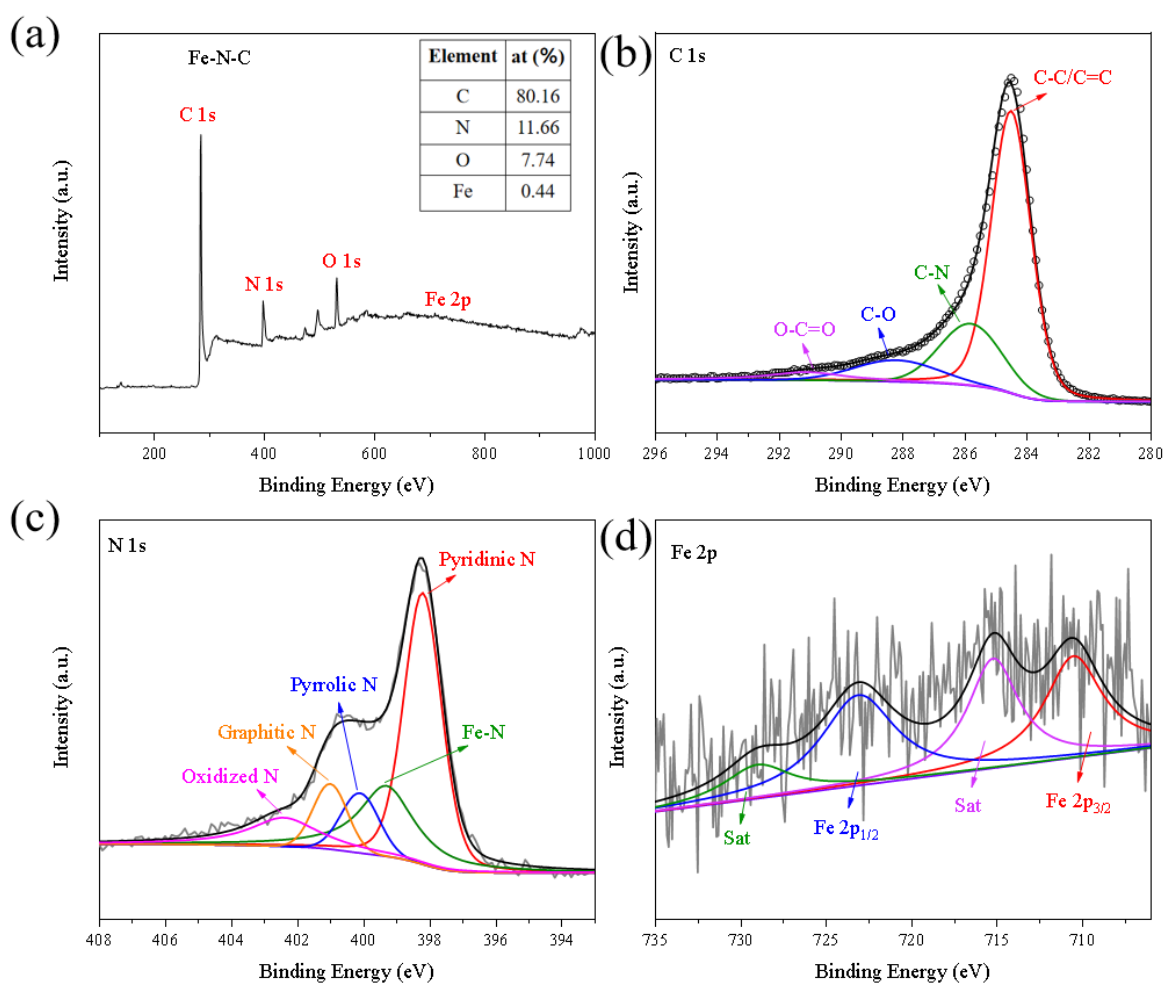

**Figure S5:** (a) XPS survey spectra of electrocatalysts. (b) High-resolution C 1s, (c) N 1s and (d) Fe 2p XPS spectra of Fe-N-C.

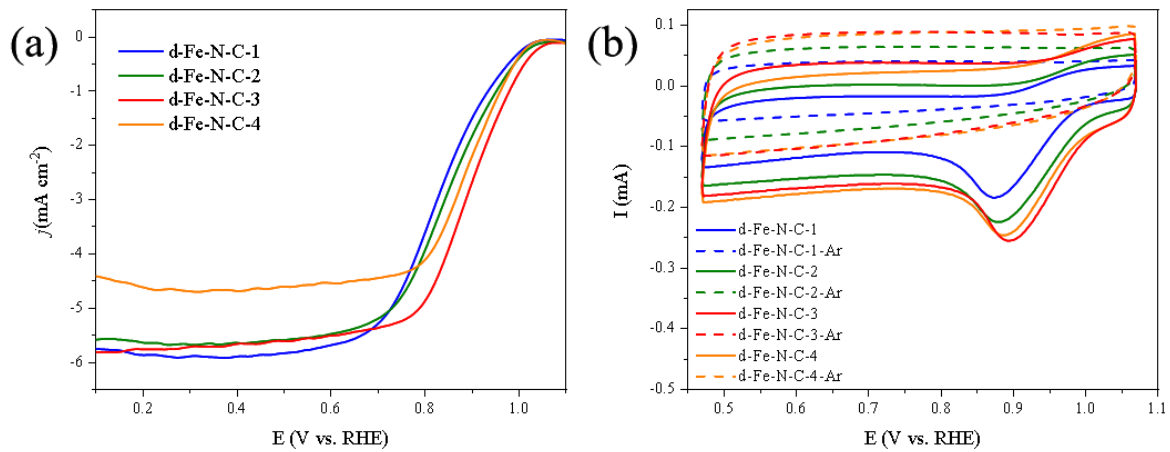

**Figure S6:** (a) LSV curves at 1600 rpm and (b) CVs of d-Fe-N-C- $x$  ( $x=1, 2, 3,$  or  $4$  mg) in O<sub>2</sub>-saturated 0.1 M KOH solution.

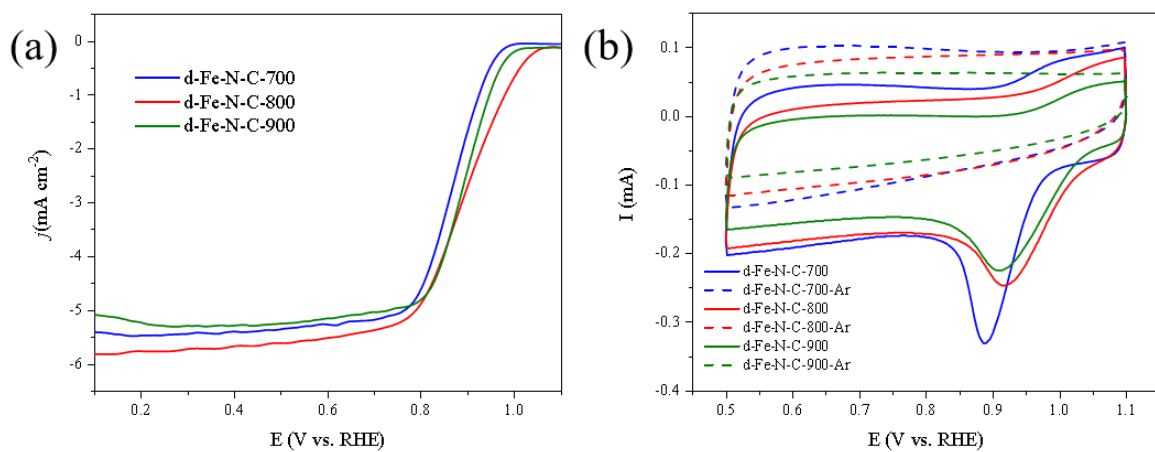

**Figure S7:** (a) LSV curves at 1600 rpm and (b) CVs of d-Fe-N-C- $T$  ( $T = 700, 800, 900^\circ\text{C}$ ) in O<sub>2</sub>-saturated 0.1 M KOH solution.

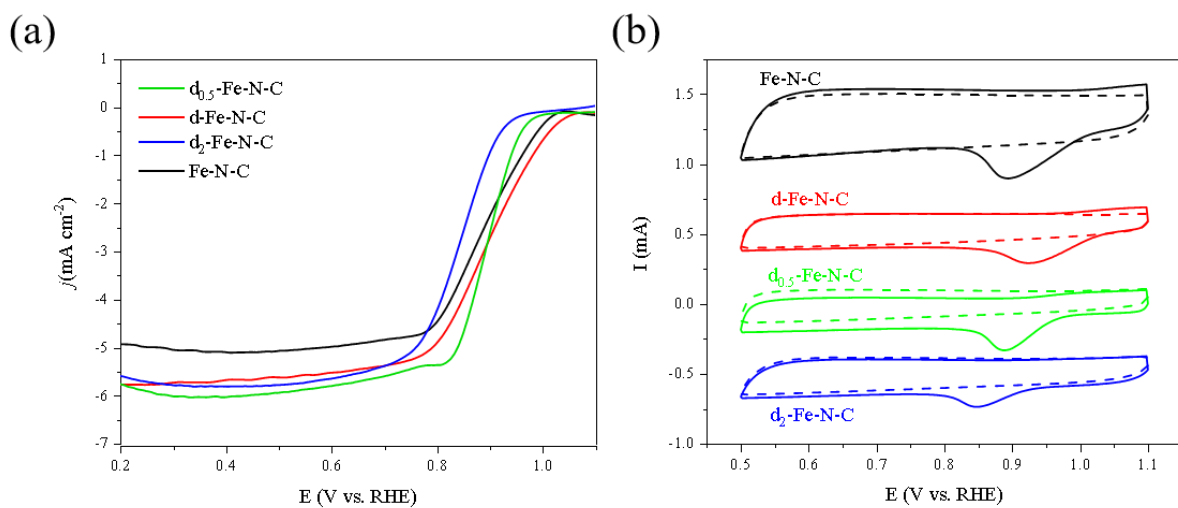

**Figure S8:** (a) LSV curves at 1600 rpm and (b) CVs of  $d_x$ -Fe-N-C ( $x = 0.5, 1, 2$ ) and Fe-N-C in O<sub>2</sub>-saturated 0.1 M KOH solution.

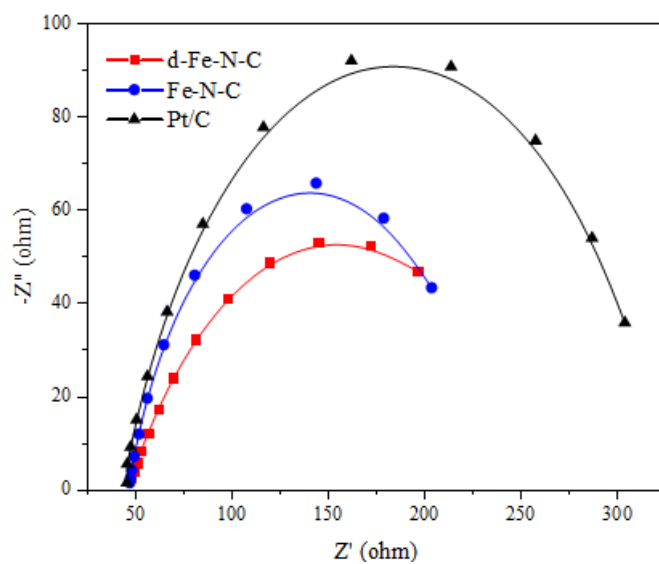

**Figure S9:** EIS curves of the  $d$ -Fe-N-C, Fe-N-C and Pt/C.

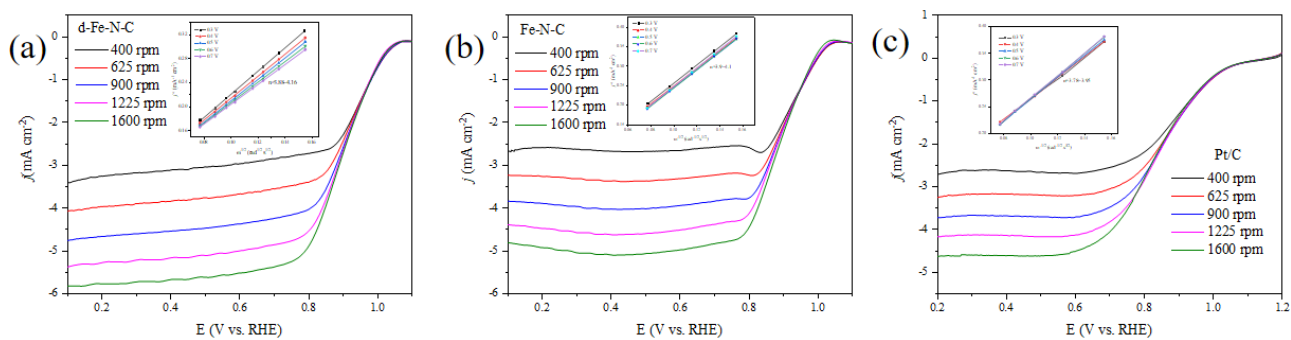

**Figure S10:** ORR polarization curves at different rotating speeds and fitted K-L plots at 0.3-0.7V of (a) d-Fe-N-C, (b) Fe-N-C, and (c) Pt/C in O<sub>2</sub>-saturated 0.1 M KOH.

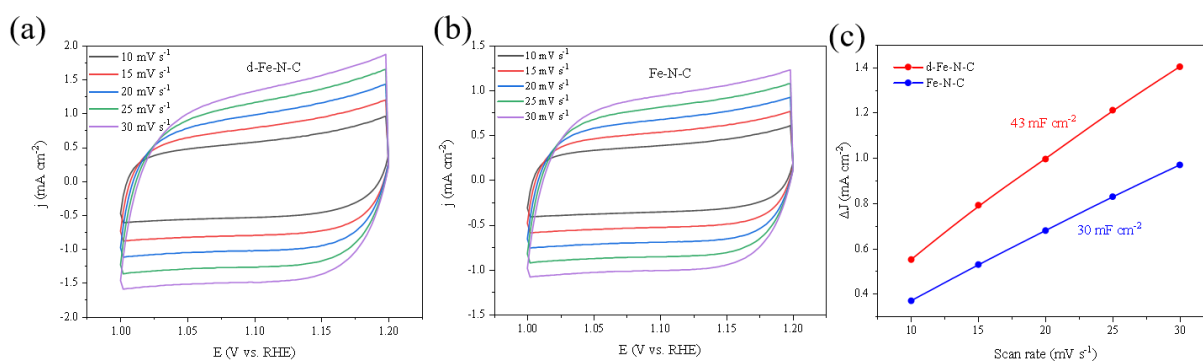

**Figure S11:** CV curves at 1.0-1.2 V (vs. RHE) with various scan rates of (a) d-Fe-N-C, (b) Fe-N-C, and (c) the corresponding Cdl of d-Fe-N-C and Fe-N-C.

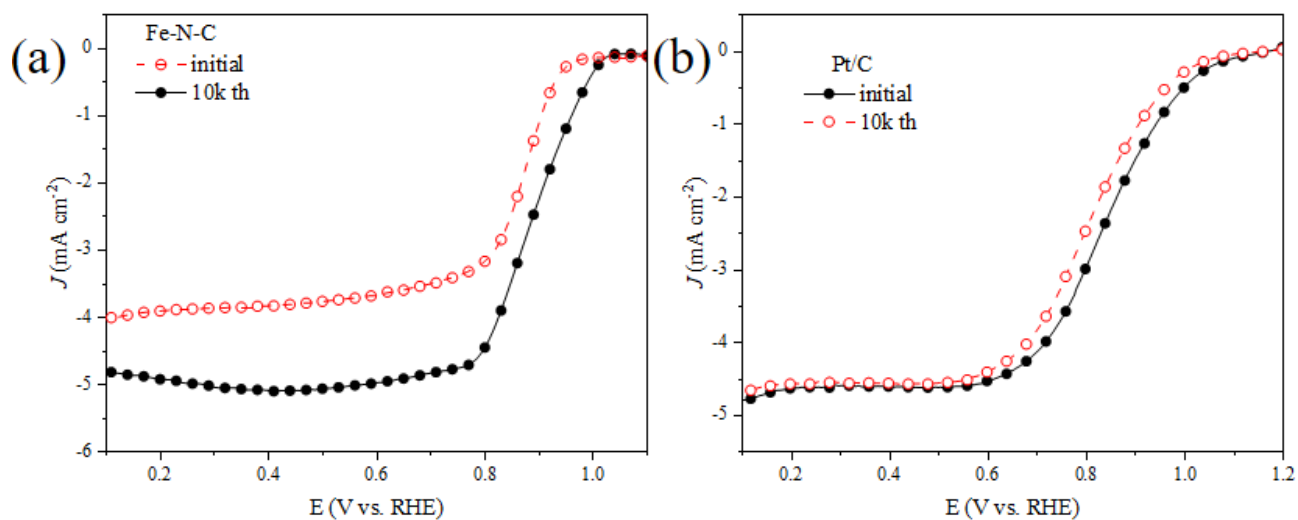

**Figure S12:** LSV curves of (a) Fe-N-C and (b) Pt/C before and after the 10,000 cycles of potential scanning from 0.2 V to 1.1 V at 100 mV s<sup>-1</sup> in O<sub>2</sub>-saturated 0.1 M KOH solution.

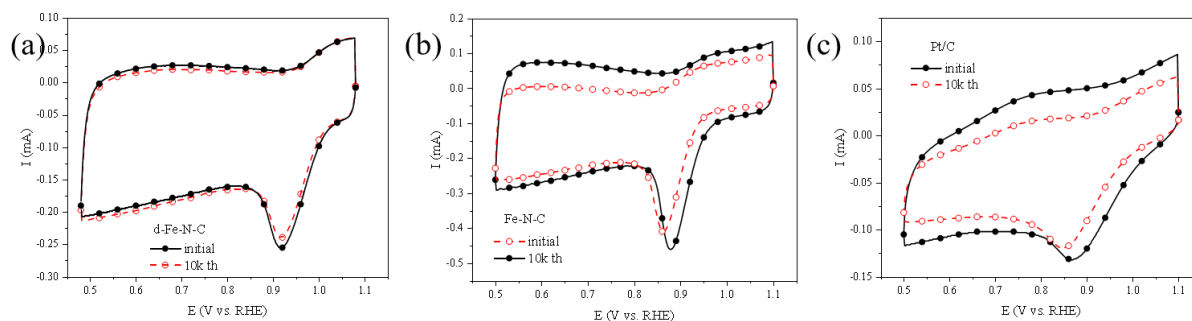

**Figure S13:** CV curves of (a) d-Fe-N-C, (b) Fe-N-C, and (c) Pt/C before and after the 10,000 cycles ADT.

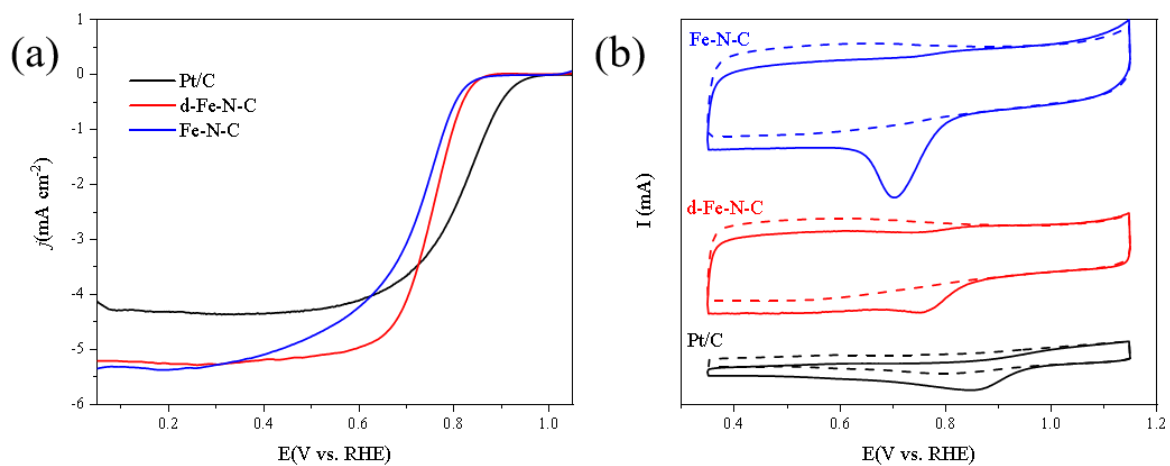

**Figure S14:** (a) LSV curves and (b) CV of different catalysts in O<sub>2</sub>-saturated 0.1 M HClO<sub>4</sub> solution at 1600 rpm.

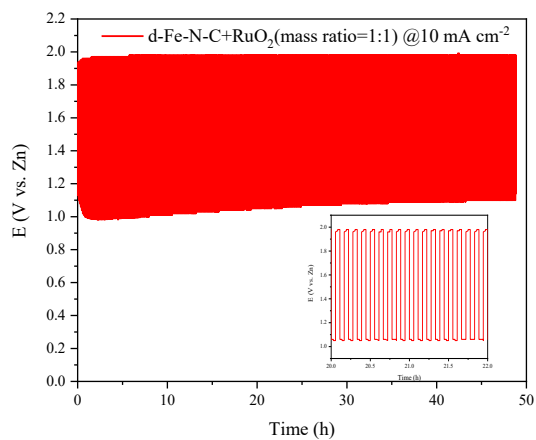

**Figure S15:** Charge-discharge curve of d-Fe-N-C-loaded ZABs at 10 mA cm<sup>-2</sup>.

**Table S1.** The content of different element for the prepared catalysts calculated from XPS.

| Sample   | Fe (at%) | N (at%) | C (at%) | O (at%) |
|----------|----------|---------|---------|---------|
| d-Fe-N-C | 0.46     | 11.95   | 80.08   | 7.51    |
| Fe-N-C   | 0.44     | 11.66   | 80.16   | 7.74    |

**Table S2.** The content of metal element for the prepared catalysts calculated from ICP-OES.

| Sample   | Fe (wt%) |
|----------|----------|
| d-Fe-N-C | 1.57     |
| Fe-N-C   | 1.52     |

**Table S3.** The content of different C species for the prepared catalysts calculated from XPS.

| Sample   | C-C/C=C | C-N    | C=O    | O=C-O |
|----------|---------|--------|--------|-------|
| d-Fe-N-C | 66.7 %  | 19.4 % | 10.5 % | 3.4 % |
| Fe-N-C   | 65.1 %  | 20.5 % | 9.7 %  | 4.7 % |

**Table S4.** The content of different N species for the prepared catalysts calculated from XPS.

| Sample   | Pyridinic N | Fe-N   | Pyrrolic N | Graphitic N | Oxidized N |
|----------|-------------|--------|------------|-------------|------------|
| d-Fe-N-C | 50.1 %      | 21.1 % | 8.8 %      | 11.5 %      | 8.5 %      |
| Fe-N-C   | 48.1 %      | 23.6 % | 9.2 %      | 9.1 %       | 10 %       |

**Table S5.** Comparison of the Fe content determined by ICP-OES in the d-Fe-N-C catalyst before and after long-term testing.

|        | Fe (wt%) |
|--------|----------|
| Before | 1.57     |
| After  | 1.56     |

**Table S6.** Comparison of ORR performance of previously reported iron-based catalysts.

| Catalysts                              | Electrolyte | $E_{1/2}$ (V vs. RHE) | Reference |
|----------------------------------------|-------------|-----------------------|-----------|
| d-Fe-N-C                               | 0.1 M KOH   | 0.91                  | This work |
| Fe-Nv-C SAC                            | 0.1 M KOH   | 0.902                 | [2]       |
| e1-Fe-N-C                              | 0.1 M KOH   | 0.876                 | [3]       |
| Fe-N-C-E                               | 0.1 M KOH   | 0.92                  | [4]       |
| Fe-SA/HPC                              | 0.1 M KOH   | 0.91                  | [5]       |
| Fe-N-DCSs                              | 0.1 M KOH   | 0.90                  | [6]       |
| Defects-FeNC                           | 0.1 M KOH   | 0.895                 | [7]       |
| G-Fe-N-C                               | 0.1 M KOH   | 0.861                 | [8]       |
| F-Fe-N-C                               | 0.1 M KOH   | 0.91                  | [9]       |
| Fe-N-C SACs                            | 0.1 M KOH   | 0.910                 | [10]      |
| r-Fe-NC                                | 0.1 M KOH   | 0.90                  | [11]      |
| Fe SA@NCZ                              | 0.1 M KOH   | 0.92                  | [12]      |
| FePc/SWCNT                             | 0.1 M KOH   | 0.952                 | [13]      |
| Fe <sub>nc</sub> /Fe <sub>1</sub> -N-C | 0.1 M KOH   | 0.931                 | [14]      |
| Fe-N/O(5.2)/OMC                        | 0.1 M KOH   | 0.94                  | [15]      |

## References

- [1] Lee S, Oh S, Oh M. A typical Hybrid Metal–Organic Frameworks (MOFs): A Combinative Process for MOF-on-MOF Growth, Etching, and Structure Transformation. *Angew. Chem. Int. Ed.*, 2020, *132*, 1343-1349.
- [2] Jia B, Xie X, Lin J, et al. Harnessing Pyridinic N Vacancy Defect in Microporous Structures to Induce the Pre-Adsorption of Oxygen and Boost Oxygen Reduction Reaction Kinetics. *Angew. Chem. Int. Ed.*, 2025, *64*, e202508674.
- [3] Pang R, Xia H, Dong X, et al. Zinc Assisted Thermal Etching for Rich Edge-Located Fe-N<sub>4</sub> Active Sites in Defective Carbon Nanofiber for Activity Enhancement of Oxygen Electroreduction. *Adv. Sci.*, 2024, *11*, 2407294.
- [4] Li X, Ye G, Zhu W, et al. Directional construction of low-coordination Fe–N<sub>3</sub> coupled with intrinsic carbon defects for high-efficiency oxygen reduction. *ACS Nano*, 2024, *18*, 24505-24514.
- [5] Wu S, Liu H, Lei G, et al. Single-atomic iron-nitrogen 2D MOF-originated hierarchically porous carbon catalysts for enhanced oxygen reduction reaction. *Chem. Eng. J.*, 2022, *441*, 135849.
- [6] Liu Y, Zong L, Zhang Y, et al. Joule heating synthesis for single-atomic Fe sites on porous carbon spheres and armchair-type edge defect engineering dominated oxygen reduction reaction performance. *Appl. Catal. B: Environ. Energy*, 2025, *361*, 124673.
- [7] Yang K Z, Xu C, Guo P P, et al. Creating Defects in the Active Site of Fe-N-C Catalyst Promotes Catalytic Performance for Oxygen Reduction Reaction. *ChemNanoMat*, 2023, *9*, e202300138.
- [8] Zhang L, Su H, Yang F, et al. Molten-salt-assisted guanine-derived Fe-N-C electrocatalyst for oxygen reduction reaction. *J. Environ. Chem. Eng.*, 2025, *13*, 115067.
- [9] Wang X, Li K, Zeng Y, et al. Dynamic Fe–F Coordination Triggered Structure-Adaptive Fe–N–C for Efficient Oxygen Reduction Electrocatalysis. *Angew. Chem. Int. Ed.*, 2025, *137*, e202513102.
- [10] Liang R, Wang J, Zhai Y, et al. Synthesis of Fe-N-C Single-Atom Catalysts with a Facile Salt-Templated Strategy for Efficient and Stable Oxygen Reduction Reaction. *ACS Appl. Energy Mater.*, 2025, *8*, 15911-15921.
- [11] Wang Q, Lu R, Yang Y, et al. Tailoring the microenvironment in Fe-N-C electrocatalysts for optimal oxygen reduction reaction performance. *Sci. Bull.*, 2022, *67*, 1264-1273.
- [12] Tan S, Wang R, Dong J, et al. Molecular Self-assembly Directed Edge Engineering of Lignin-Derived Fe-N-C Single-Atom Catalysts for Efficient Oxygen Reduction Reaction. *Energy Storage Mater.*, 2025, 104729.
- [13] Charles B. Musgrave III, Su J, Xiong P, et al. Molecular strain accelerates electron transfer for enhanced oxygen reduction. *J. Am. Chem. Soc.*, 2025, *147*, 3786-3795.

- [14] Yu J, Fan H S, Liang X, et al. Fe Clusters Liganded Single-Atom Fe-N-C Hollow Nanosheets as Bifunctional Catalysts for Stable Zn— air/Iodide Hybrid Batteries. *Adv. Sustain. Syst.*, 2025, 9, e01217.
- [15] Pei C, Yao G, Zhao Z, et al. eg Electron Occupancy as a Descriptor for Designing Iron Single-Atom Electrocatalysts. *Adv. Mater.*, 2025, 37, 2504852.
